# Supplementary material
Source: Springer Nature journal article supplement (https://www.springermedizin.de/resource/supplementary/12889_2009_2062_MOESM6_ESM.pdf/9484474)

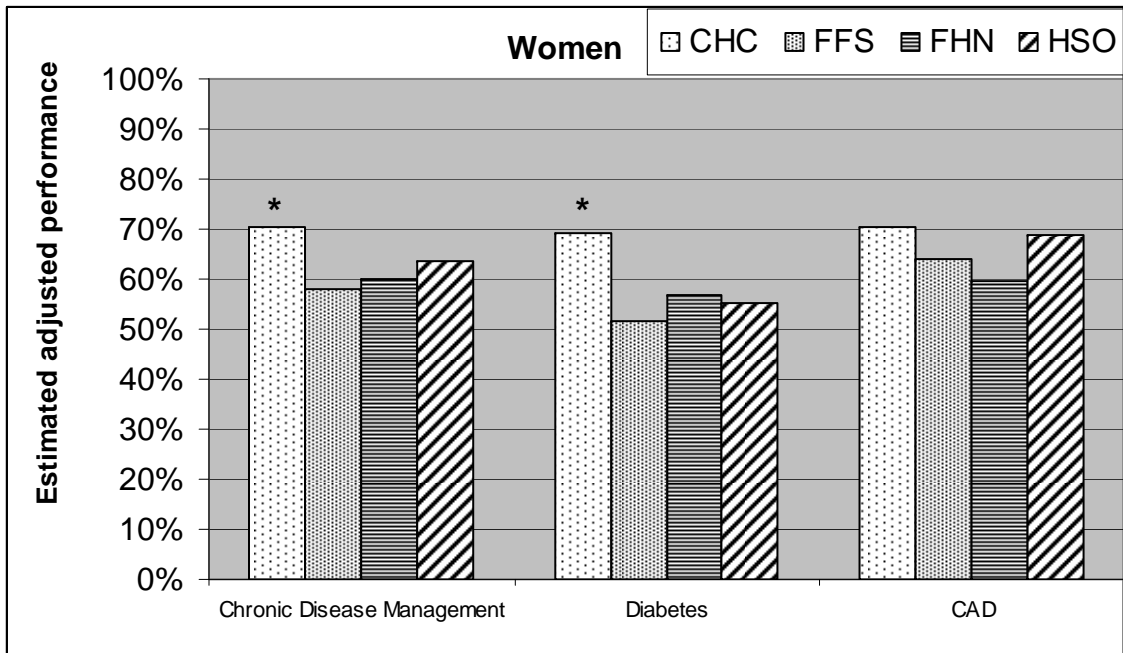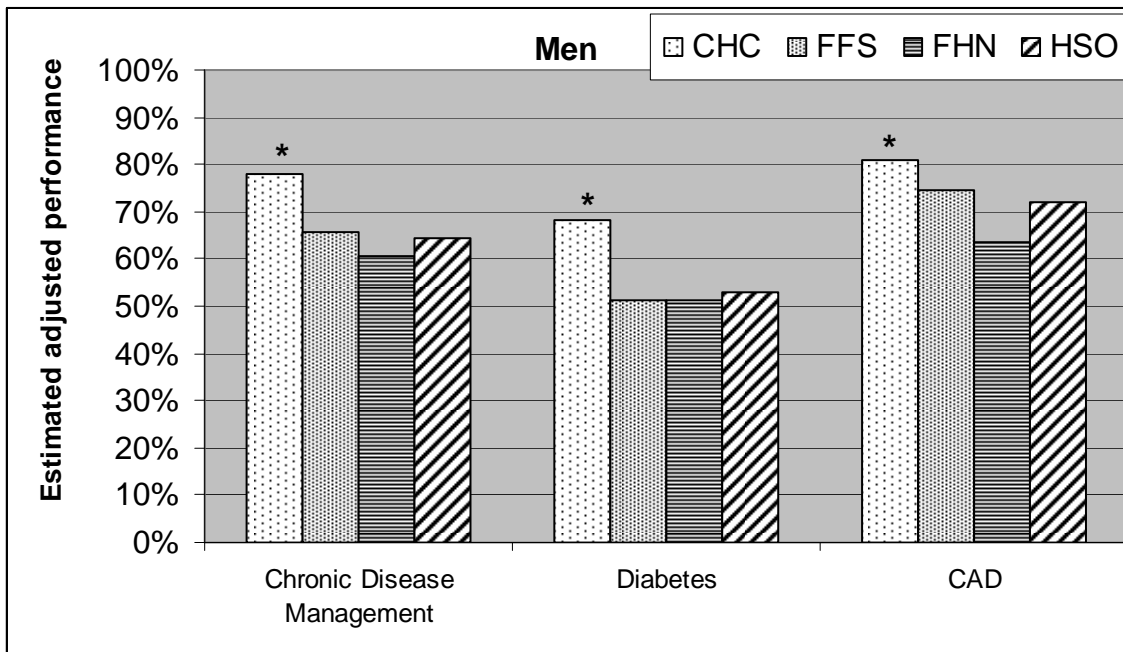

Supplement: MOESM6 [file 9484474]
